# Supplementary material for: ERK1/2 inhibits Cullin 3/SPOP-mediated PrLZ ubiquitination and degradation to modulate prostate cancer progression
Source: PubMed Central journal article supplement (PMC9345960; doi:10.1038/s41418-022-00951-y), 2022-02-22
Supplement: 41418_2022_951_MOESM4_ESM.pdf [file 41418_2022_951_MOESM4_ESM.pdf]

**Important information. Please read.**

- This form should be used by authors to request any change in authorship (adding/deleting authors) including changes in corresponding authors. This form should not be used for name changes. Please fully complete all sections. Use black ink and block capitals and provide each author's full name with the given name first followed by the family name.
- By signing this declaration, all authors guarantee that the order of the authors are in accordance with their scientific contribution, if applicable as different conventions apply per discipline, and that only authors have been added who made a meaningful contribution to the work.
- Please note, in author collaborations where there is formal agreement for representing the collaboration, it is sufficient for the representative or legal guarantor (usually the corresponding author) to complete and sign the Authorship Change Form on behalf of all authors, **next to the added/removed author(s). (Complete Section 3, followed by Section 6.)**  
In author collaborations where there is no formal agreement for representing the collaboration and **there are more than 10 authors**, one may sign for all, provided the signer appends correspondence that attests that each of the authors have agreed to the change **and the added/removed authors sign the form. (Complete Section 3, followed by Section 6.)**
- Please note, we cannot investigate or mediate any authorship disputes. If you are unable to obtain agreement from all authors (including those who you wish to be removed) you must refer the matter to your institution(s) for investigation. Please inform us if you need to do this.
- If you are not able to return a fully completed form within **30 days** of the date that it was sent to the author requesting the change, we may have to withdraw your manuscript. We cannot publish manuscripts where authorship has not been agreed by all authors (including those who have been removed).
- Incomplete forms will be rejected.
- Please return/upload this form, fully completed, to the Journals Editorial Office. The Journal and/or Publisher will consider the information you have provided to decide whether to approve the proposed change in authorship. We may decide to contact your institution for more information or undertake a further investigation, if appropriate, before making a final decision.

Section 1: Please provide the current title of manuscript

Manuscript ID no.: CDD-21-1441R

Title: ERK1/2 inhibits Cullin 3/SPOP-mediated PrLZ ubiquitination and degradation to modulate prostate cancer progression

Section 2: Please provide the previous authorship, in the order shown on the manuscript before the changes were introduced. Please indicate the corresponding author by adding (CA) behind the name.

|                         | First name(s) | Family name | ORCID or SCOPUS id, if available |
|-------------------------|---------------|-------------|----------------------------------|
| 1 <sup>st</sup> author  | Yizeng        | Fan         |                                  |
| 2 <sup>nd</sup> author  | Tao           | Hou         |                                  |
| 3 <sup>rd</sup> author  | Yasheng       | Zhu         |                                  |
| 4 <sup>th</sup> author  | Weichao       | Dan         |                                  |
| 5 <sup>th</sup> author  | Bo            | Liu         |                                  |
| 6 <sup>th</sup> author  | Yi            | Wei         |                                  |
| 7 <sup>th</sup> author  | Zixi          | Wang        |                                  |
| 8 <sup>th</sup> author  | Yang          | Gao         |                                  |
| 9 <sup>th</sup> author  | Jin           | Zeng        |                                  |
| 10 <sup>th</sup> author | Lei           | Li (CA)     | 0000-0003-4928-8722              |

Please use an additional sheet if there are more than 10 authors.



Section 3: Please provide a justification for change. Please use this section to explain your reasons for changing the authorship of your manuscript, e.g. what necessitated the change in authorship? Please refer to the (journal) policy pages for more information about authorship. Please explain why omitted authors were not originally included and/or why authors were removed on the submitted manuscript.

No new author was added.

We changed the authorship order of Weichao Dan and Yasheng Zhu, for that Weichao Dan completed more experiments in the revision stage.

We listed Jin Zeng as one of the co-corresponding author, for that Jin Zeng offered helpful guidance in the revision stage.

Section 4: Proposed new authorship. Please provide your new authorship list in the order you would like it to appear on the manuscript. Please indicate the corresponding author by adding (CA) behind the name. If the Corresponding Author has changed, please indicate the reason under section 3.

|                         | First name(s) | Family name (this name will appear in full on the final publication and will be searchable in various abstract and indexing databases) | Affiliated institute                                           | E-mail address            |
|-------------------------|---------------|----------------------------------------------------------------------------------------------------------------------------------------|----------------------------------------------------------------|---------------------------|
| 1 <sup>st</sup> author  | Yizeng        | Fan                                                                                                                                    | The First Affiliated Hospital of Xi'an Jiaotong University     | yzfan1991@163.com         |
| 2 <sup>nd</sup> author  | Tao           | Hou                                                                                                                                    | The First Affiliated Hospital of Xi'an Jiaotong University     | houtao1994@126.com        |
| 3 <sup>rd</sup> author  | Weichao       | Dan                                                                                                                                    | The First Affiliated Hospital of Xi'an Jiaotong University     | danwc1997@outlook.com     |
| 4 <sup>th</sup> author  | Yasheng       | Zhu                                                                                                                                    | Shanghai Changhai Hospital, Second Military Medical University | 574259644@qq.com          |
| 5 <sup>th</sup> author  | Bo            | Liu                                                                                                                                    | The First Affiliated Hospital of Xi'an Jiaotong University     | 939305754@qq.com          |
| 6 <sup>th</sup> author  | Yi            | Wei                                                                                                                                    | The First Affiliated Hospital of Xi'an Jiaotong University     | wairky323@stu.xjtu.edu.cn |
| 7 <sup>th</sup> author  | Zixi          | Wang                                                                                                                                   | The First Affiliated Hospital of Xi'an Jiaotong University     | wzxde1222@163.com         |
| 8 <sup>th</sup> author  | Yang          | Gao                                                                                                                                    | The First Affiliated Hospital of Xi'an Jiaotong University     | gaoyangxjtu@126.com       |
| 9 <sup>th</sup> author  | Jin           | Zeng (CA)                                                                                                                              | The First Affiliated Hospital of Xi'an Jiaotong University     | zengjin1984@gmail.com     |
| 10 <sup>th</sup> author | Lei           | Li (CA)                                                                                                                                | The First Affiliated Hospital of Xi'an Jiaotong University     | lijydr@163.com            |

Please use an additional sheet if there are more than 10 authors.

**Section 5: Author contribution, Acknowledgement and Disclosures.** Please use this section to provide a new disclosure statement and, if appropriate, acknowledge any contributors who have been removed as authors and ensure you state what contribution any new authors made (if applicable per the journal or book (series) policy). Please ensure these are updated in your manuscript - after approval of the change(s) - as our production department will not transfer the information in this form to your manuscript.

**New acknowledgements:**

Not applicable

**New Disclosures (financial and non-financial interests, funding):**

**Conflict of interest**

The authors have declared that no competing interest exists.

**Funding**

This work was supported by grants from the National Natural Science Foundation of China (NO. 81925028, 82073304, 82002694 and 81773206).

**New Author Contributions statement (if applicable per the journal policy):**

Y.Z.F., T.H., W.C.D. and Y.S.Z. have contributed equally to this work. J.Z. and L.L. designed and supervised all experiments and contributed to the manuscript preparation. Y.Z.F., T.H., W.C.D., Y.S.Z., B.L., Y.W., Z.X.W., Y.G. and J.Z. performed the experiments, analyzed the data and contributed to the manuscript preparation. Y.Z.F., T.H. and Y.S.Z. collected animal samples and participated in the animal experiments. Y.Z.F., J.Z., Y.G. and L.L., wrote the manuscript.

State 'Not applicable' if there are no new authors.



**Section 6: Declaration of agreement. All authors, unchanged, new and removed must sign this declaration.**

(NB: Please print the form, (docu)-sign and return/upload a scanned copy. Please note that signatures that have been inserted as an image file are acceptable as long as it is handwritten. Typed names in the signature box are unacceptable.) \* Please delete as appropriate. Delete all of the bold if you were on the original authorship list and are remaining as an author.

|                         | First name | Family name | I agree to the proposed new authorship shown in section 4 and the proposed change in corresponding author                                                               | Signature   | Date       |
|-------------------------|------------|-------------|-------------------------------------------------------------------------------------------------------------------------------------------------------------------------|-------------|------------|
| 1 <sup>st</sup> author  | Yizeng     | Fan         | I agree to the proposed new authorship shown in section 4 and the proposed change in corresponding author                                                               | Yizeng Fan  | 2022-01-24 |
| 2 <sup>nd</sup> author  | Tao        | Hou         | I agree to the proposed new authorship shown in section 4 and the proposed change in corresponding author                                                               | Tao Hou     | 2022-01-24 |
| 3 <sup>rd</sup> author  | Weichao    | Dan         | I agree to the proposed new authorship shown in section 4 /and the addition/removal* of my name to the authorship list /and the proposed change in corresponding author | Weichao Dan | 2022-01-24 |
| 4 <sup>th</sup> authors | Yasheng    | Zhu         | I agree to the proposed new authorship shown in section 4 /and the addition/removal* of my name to the authorship list /and the proposed change in corresponding author | Yasheng Zhu | 2022-01-24 |
| 5 <sup>th</sup> author  | Bo         | Liu         | I agree to the proposed new authorship shown in section 4 and the proposed change in corresponding author                                                               | Bo Liu      | 2022-01-24 |
| 6 <sup>th</sup> author  | Yi         | Wen         | I agree to the proposed new authorship shown in section 4 and the proposed change in corresponding author                                                               | Yi Wen      | 2022-01-24 |
| 7 <sup>th</sup> author  | Zixi       | Wang        | I agree to the proposed new authorship shown in section 4 and the proposed change in corresponding author                                                               | Zixi Wang   | 2022-1-24  |

|                         | First name | Family name | I agree to the proposed new authorship shown in section 4 and the proposed change in corresponding author                                                               | Signature | Date        |
|-------------------------|------------|-------------|-------------------------------------------------------------------------------------------------------------------------------------------------------------------------|-----------|-------------|
| 8 <sup>th</sup> author  | Yang       | Gao         | I agree to the proposed new authorship shown in section 4 and the proposed change in corresponding author                                                               | Yang Gao  | 2022,01,24  |
| 9 <sup>th</sup> author  | Jin        | Zeng        | I agree to the proposed new authorship shown in section 4 /and the addition/removal* of my name to the authorship list /and the proposed change in corresponding author | Jin Zeng  | Jan-23-2022 |
| 10 <sup>th</sup> author | LI         | LI          | I agree to the proposed new authorship shown in section 4 and the proposed change in corresponding author                                                               | Li        | Jan-25-2022 |

Please use an additional sheet if there are more than 10 authors.

### In case of author collaborations with formal agreement:

| Representative/legal guarantor | Name of consortium/consortia | First name | Family name | Signature | Date |
|--------------------------------|------------------------------|------------|-------------|-----------|------|
|                                |                              |            |             |           |      |

Both added/removed authors should complete the information in the first table under Section 6.

----- End of form -----
